# Supplementary material
Source: PubMed Central journal article supplement (PMC6668340)

# Supplementary Figure 1

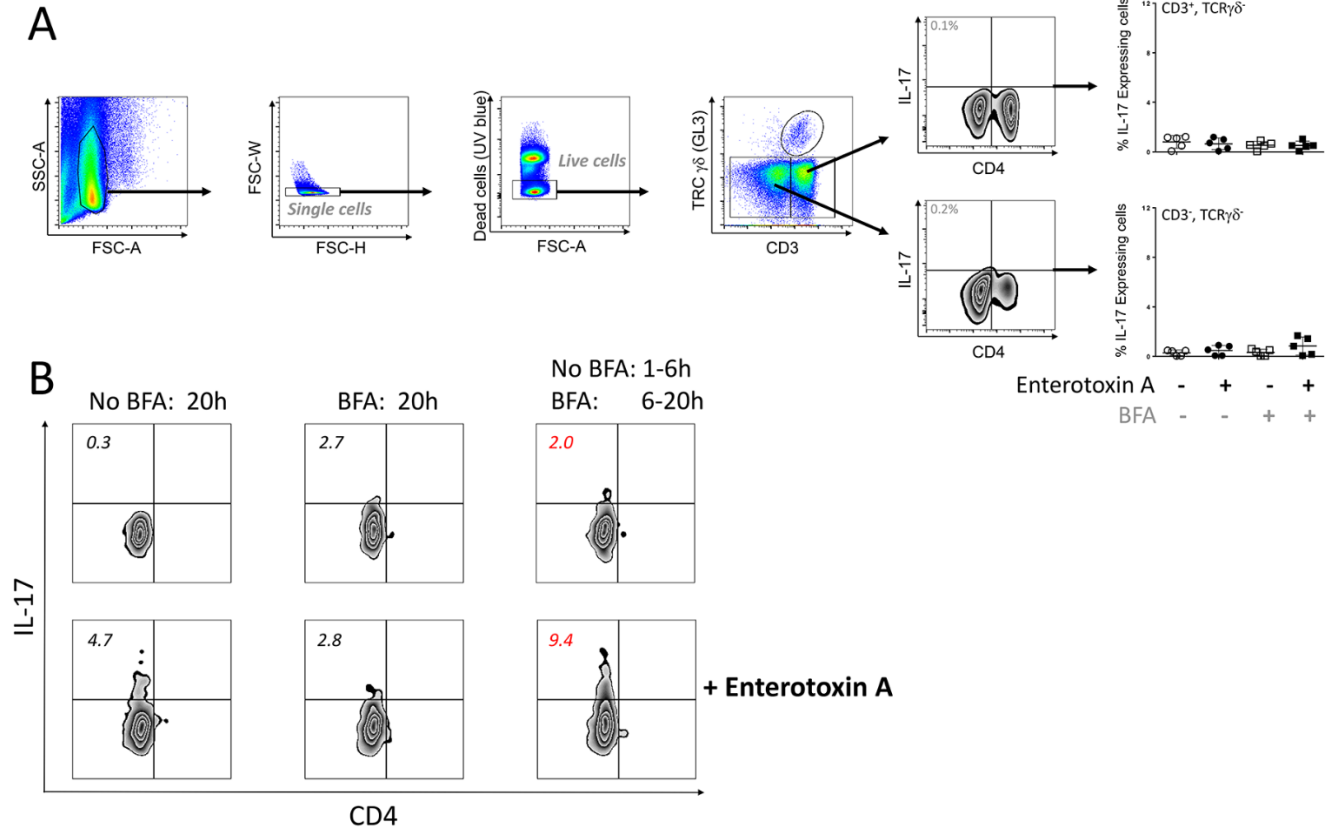

## Supplementary Figure 2

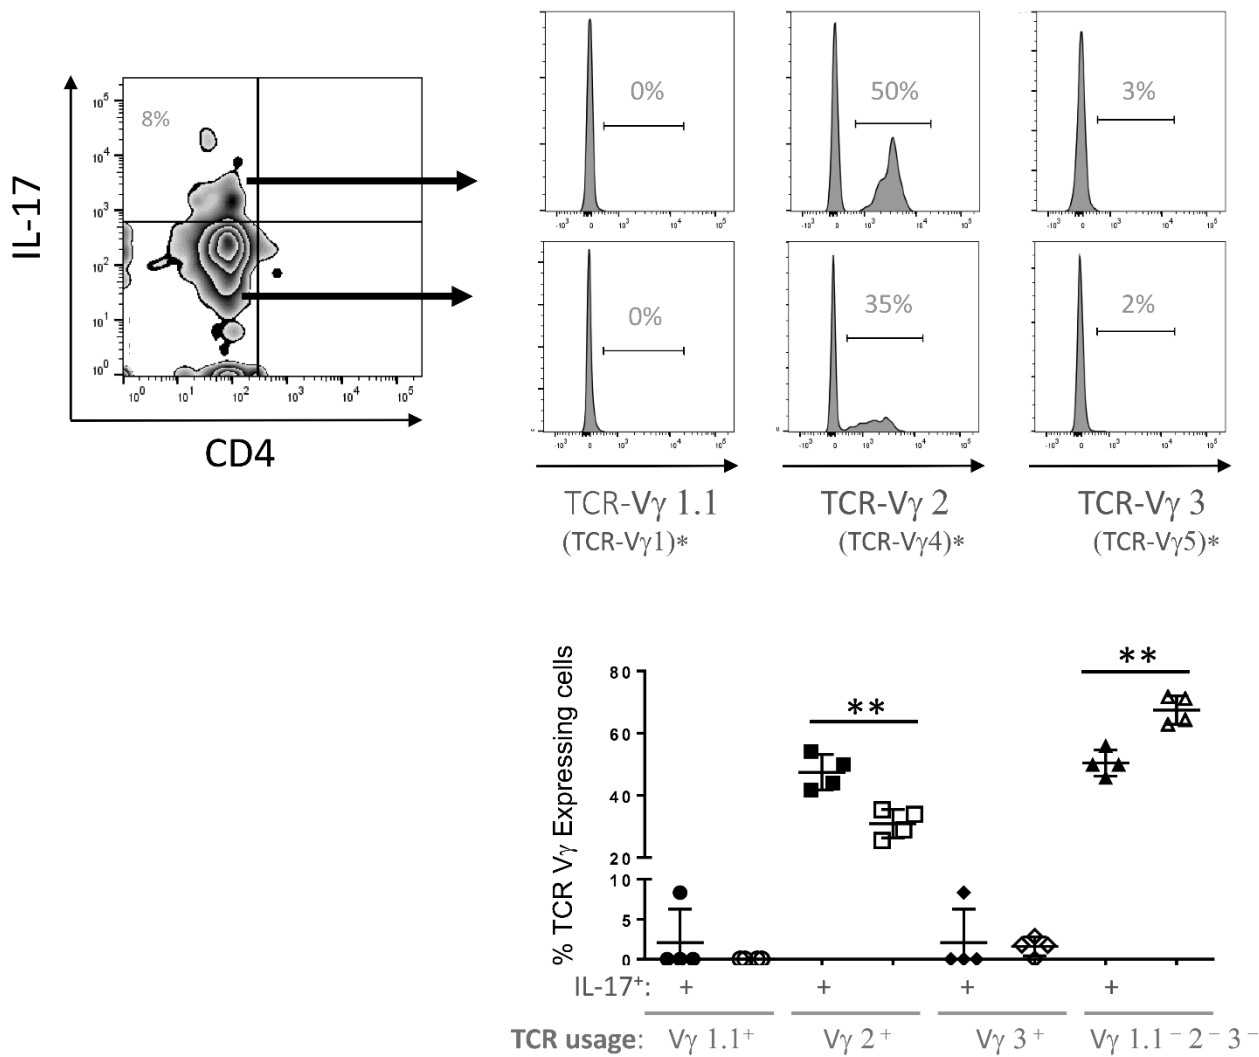

# Supplementary Figure 3

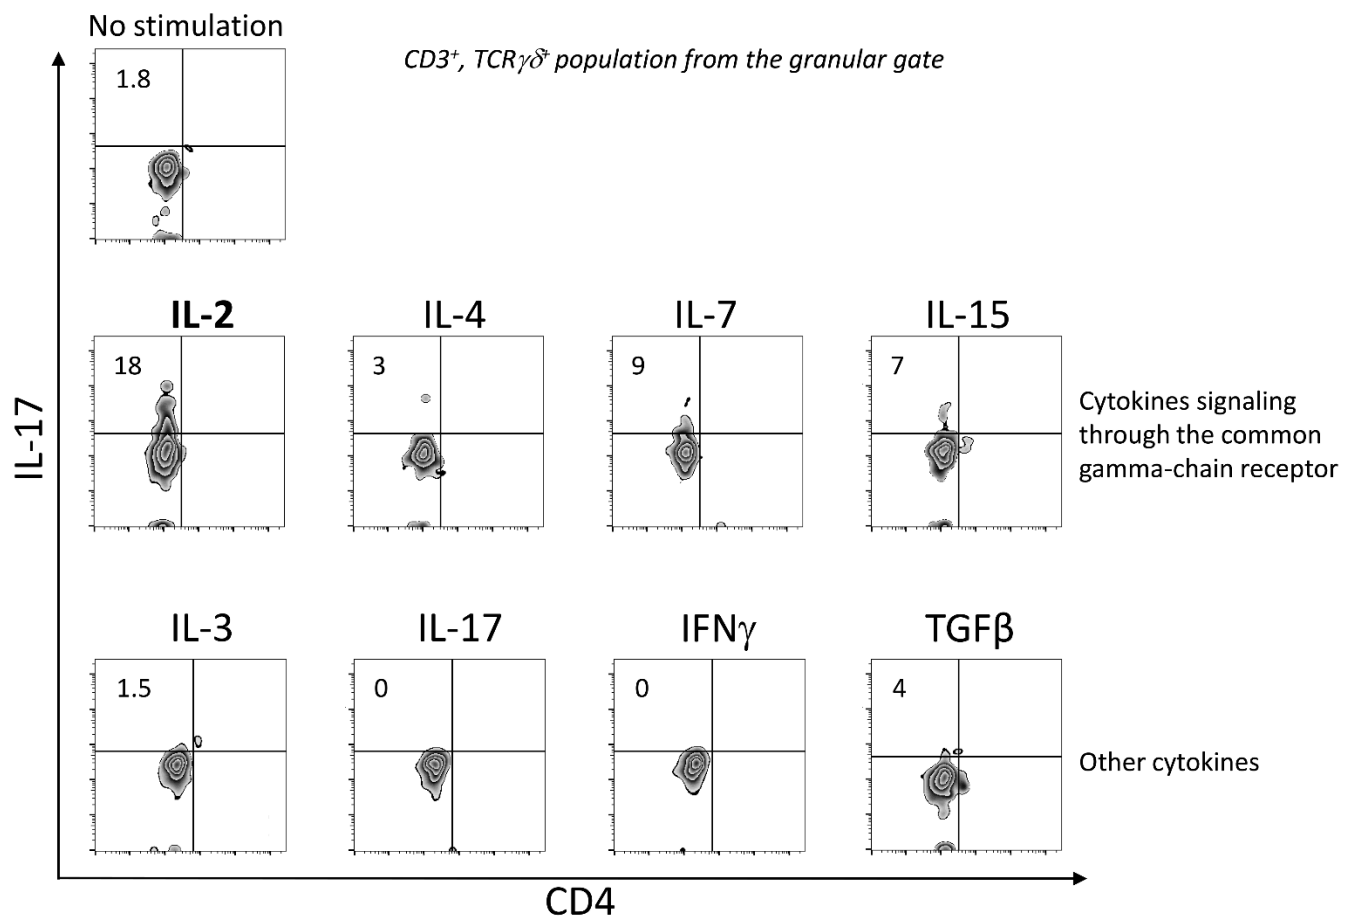

# Supplementary Figure 4

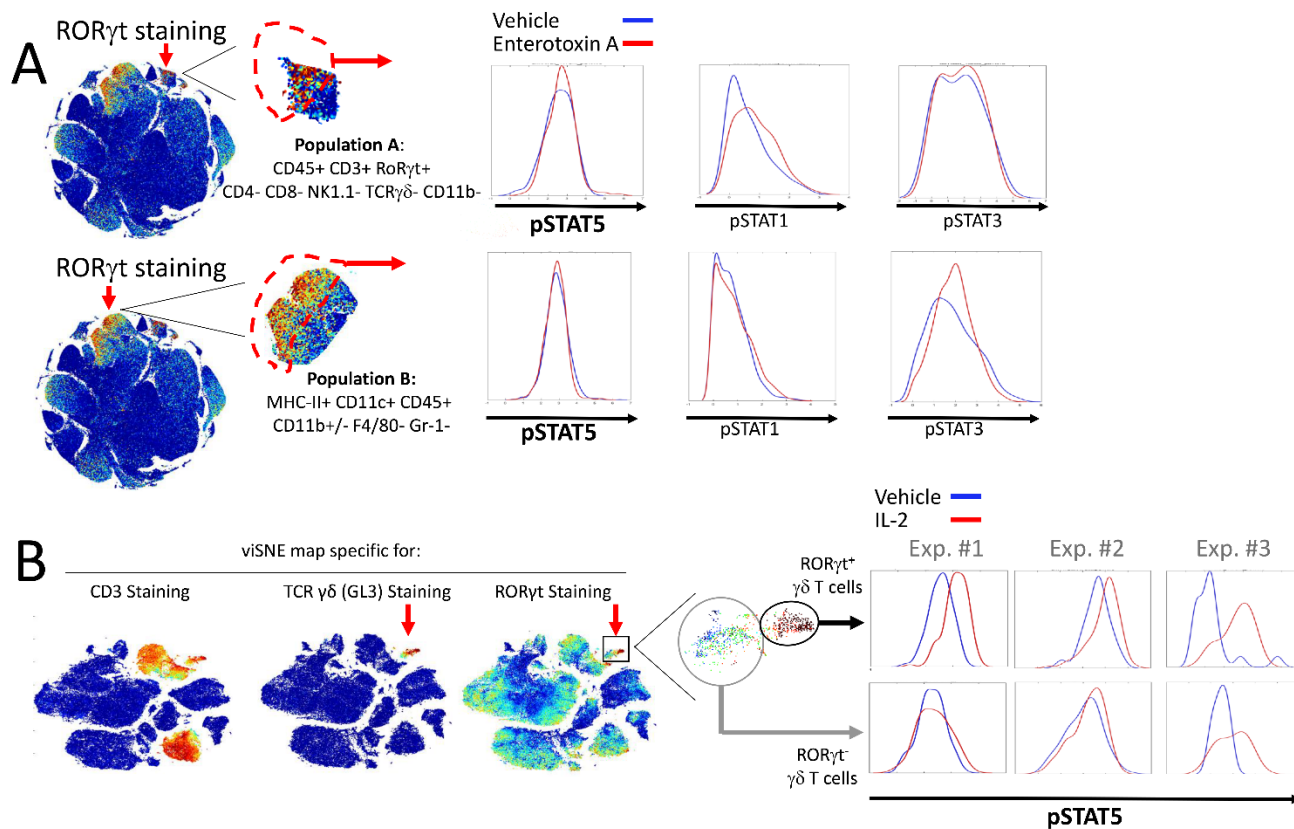

Supplementary Figure 5

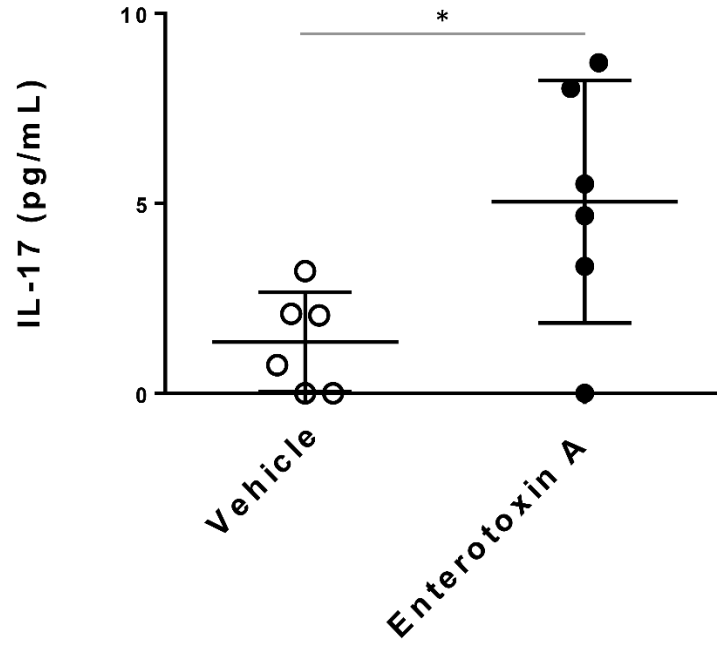

## Supplementary Figure 6

### A

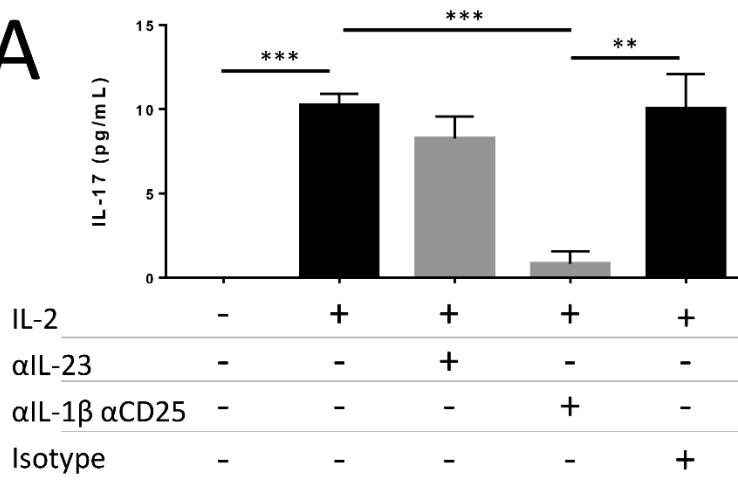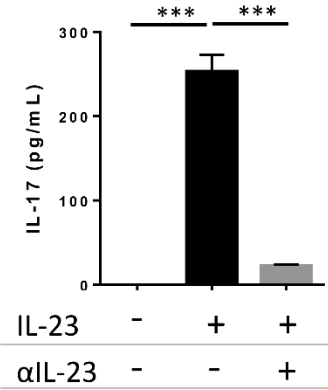

### B

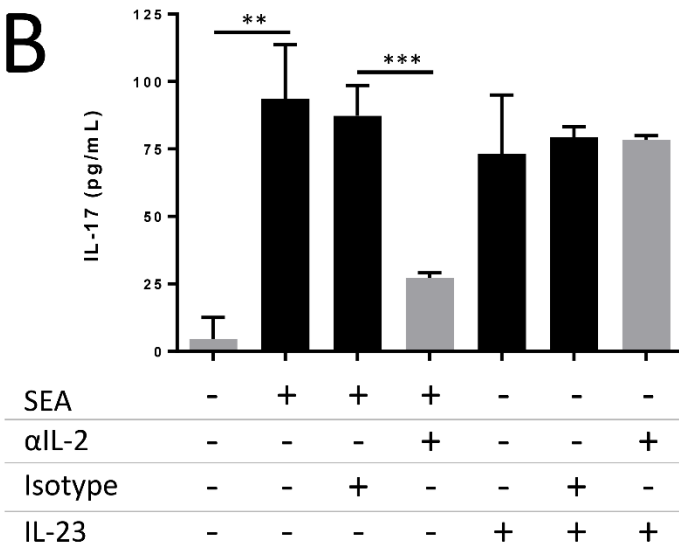

Supplement: NIHMS1041953-supplement-supp.pdf [file NIHMS1041953-supplement-supp.pdf]
